# Supplementary material for: A Benchmark of In-House Homologous Recombination Repair Deficiency Testing Solutions for High-Grade Serous Ovarian Cancer Diagnosis
Source: Preprints.org preprint supplement (doi:10.20944/preprints202308.0332.v2), 2023-09-06
Supplement: Supplementary file 1 [file supplementary]

## Sheet: Supplementary_Table_1
							Myriad				Sophia									AmoyDx
#	Replica	Patient age at sample collection	Cancer location	Estimated tumor content (%)	Functional DNA qPCR (ng/µl)	gDNA profile (Tape)*	BRCA status	PGI	PGI status	HRD status	DNA input (ng)	Library yield (nM)	Residual noise	long-range fluctuations	QA	BRCA status	PGI	PGI status	HRD status	DNA input (ng)	Library yield (nM)	QA	BRCA status	PGI	PGI status	HRD status
1		37.9479	Ovary	0.8	32.34	-	N/A	N/A	N/A	N/A	100	702.3	0.08	0.2	Pass	Negative	15.9	Positive	Positive	N/A	N/A	N/A	N/A	N/A	N/A	N/A
2	B	37.9479	Ovary	0.8	32.34	-	N/A	N/A	N/A	N/A	150	460.9	0.09	0.2	Pass	Negative	14.6	Positive	Positive	N/A	N/A	N/A	N/A	N/A	N/A	N/A
3		71.4658	Ovary	0.8	14.87	-	N/A	N/A	N/A	N/A	100	523.2	0.11	0.34	Pass	BRCA1(NM_007300,3): c,5386A>T (p,Met1796Leu) [VUS]	8.8	Positive	Positive	N/A	N/A	N/A	N/A	N/A	N/A	N/A
4		52.1507	Ovary	0.9	78.36	-	N/A	N/A	N/A	N/A	100	1134.5	0.07	0.26	Rejected	BRCA2: c,5946delT; p,Ser1982ArgfsTer22	23.3	Positive	Fail	N/A	N/A	N/A	N/A	N/A	N/A	N/A
5		67.9945	Ovary	0.7	83.62	-	N/A	N/A	N/A	N/A	100	956.2	0.09	0.11	Rejected	Negative	-11.8	Negative	Fail	N/A	N/A	N/A	N/A	N/A	N/A	N/A
6		50.3671	Ovary	0.6	9.32	-	N/A	N/A	N/A	N/A	100	596.4	0.1	0.21	Pass	BRCA2: c,5218_5223delTTAAGT (p,Leu1740_Ser1741del)	12.9	Positive	Positive	N/A	N/A	N/A	N/A	N/A	N/A	N/A
7		47.1151	Ovary	0.8	52.35	-	N/A	N/A	N/A	N/A	150	872.7	0.08	0.19	Pass	BRCA1(NM_007294,3): c,3607C>T; p,Arg1203Ter	9.8	Positive	Positive	N/A	N/A	N/A	N/A	N/A	N/A	N/A
8		47.0356	Ovary	0.8	34.48	good	Negative	N/A	Positive	Positive	150	1004.7	0.07	0.22	Pass	Negative	12.3	Positive	Positive	N/A	N/A	N/A	N/A	N/A	N/A	N/A
9	B	47.0356	Ovary	0.8	34.48	good	Negative	N/A	Positive	Positive	150	1004.7	0.08	0.22	Pass	Negative	12.2	Positive	Positive	N/A	N/A	N/A	N/A	N/A	N/A	N/A
10		69.4712	Ovary	0.9	89.85	-	N/A	N/A	N/A	N/A	N/A	998.4	0.07	0.34	Pass	N/A	17.3	Positive	Positive	N/A	N/A	N/A	N/A	N/A	N/A	N/A
11		62.8	Ovary	0.9	47.74	-	N/A	N/A	N/A	N/A	N/A	683.8	0.12	0.36	Pass	N/A	2	Positive	Positive	N/A	N/A	N/A	N/A	N/A	N/A	N/A
12		52.126	Ovary	0.2	75.84	-	N/A	N/A	N/A	N/A	N/A	832.5	0.1	0.05	Rejected	N/A	-21.3	Negative	Fail	N/A	N/A	N/A	N/A	N/A	N/A	N/A
13		77.1973	Ovary	0.8	130.58	-	N/A	N/A	N/A	N/A	N/A	912.9	0.07	0.35	Pass	N/A	-0.9	Negative	N/A, Negative	N/A	N/A	N/A	N/A	N/A	N/A	N/A
14		64.8493	Peritoneum	0.6	41.7	-	N/A	N/A	N/A	N/A	N/A	1211.5	0.06	0.26	Pass	N/A	-4.6	Negative	N/A, Negative	N/A	N/A	N/A	N/A	N/A	N/A	N/A
15		37.9479	Ovary	0.7	32.69	-	N/A	N/A	N/A	N/A	N/A	725.9	0.11	0.13	Rejected	N/A	0.3	Negative	Fail	N/A	N/A	N/A	N/A	N/A	N/A	N/A
16		60.6986	Ovary	0.8	38.42	-	N/A	N/A	N/A	N/A	N/A	723.4	0.08	0.29	Pass	N/A	-11.6	Negative	N/A, Negative	N/A	N/A	N/A	N/A	N/A	N/A	N/A
17		55.1507	Ovary	0.3	38.53	-	N/A	N/A	N/A	N/A	N/A	701.8	0.06	0.06	Rejected	N/A	-9.7	Negative	Fail	N/A	N/A	N/A	N/A	N/A	N/A	N/A
18		36.2438	Ovary	0.6	7.92	bad	Negative	19	Negative	Negative	150	477.5	0.09	0.27	Pass	Negative	-3.2	Negative	Negative	N/A	N/A	N/A	N/A	N/A	N/A	N/A
19		67.0411	Peritoneum	0.8	203.5	good	VUS reported: BRCA2 c,5284T>G (p,Tyr1762Asp)	21	Negative	Negative	150	689.2	0.08	0.11	Pass	BRCA2: c,5284T>G (p,Tyr1762Asp) [VUS]	-5.2	Negative	Negative	100	411.7	PASS	BRCA2 c,5284T>G (p,Tyr1762Asp) [VUS]	20.9	Negative	Negative
20		36.2658	Ovary	0.5	95.08	good	VUS reported: BRCA2 c,6988A>G (p,Ile2330Val)	23	Negative	Negative	150	615.9	0.08	0.03	Silent	BRCA2: c,6988A>G (p,Ile2330Val) [VUS]	-27.6	Negative	Fail	100	444.7	PASS	BRCA2 c,6988A>G (p,Ile2330Val) [VUS]	1.6	Negative	Negative
21		46.7699	Peritoneum	0.75	37.76	good	BRCA1: c,2217dupA (p,Val740Serfs*3)	81	Positive	Positive	150	587.6	0.08	0.2	Pass	BRCA1: c,2217dupA (p,Val740Serfs*3)	10.3	Positive	Positive	100	293.9	PASS	BRCA1: c,2217dupA (p,Val740Serfs*3)	100	Positive	Positive
22		58.6521	Ovary	0.7	73.8	good	BRCA2: c,8373del (p,Lys2791Asnfs*30)	82	Positive	Positive	150	588.3	0.1	0.26	Pass	BRCA2: c,8373del (p,Lys2791Asnfs*30)	13.3	Positive	Positive	N/A	N/A	N/A	N/A	N/A	N/A	N/A
23		37.4384	Ovary	0.9	24.44	bad	Negative	4	Negative	Negative	150	431.7	0.09	0.18	Pass	Negative	-14.9	Negative	Negative	100	172.7	FAIL	Negative	0.9	Negative	Fail
24		72.9534	Ovary	0.9	250.06	good	Negative	64	Positive	Positive	150	461.9	0.1	0.37	Pass	Negative	14.6	Positive	Positive	100	325.9	PASS	Negative	95.4	Positive	Positive
25	B	72.9534	Ovary	0.9	250.06	good	Negative	64	Positive	Positive	150	547.2	0.12	0.37	Pass	Negative	12.5	Positive	Positive	N/A	N/A	N/A	N/A	N/A	N/A	N/A
26	C	72.9534	Ovary	0.9	250.06	good	Negative	64	Positive	Positive	100	734	0.09	0.37	Pass	Negative	12.7	Positive	Positive	N/A	N/A	N/A	N/A	N/A	N/A	N/A
27		67.3507	Ovary	0.7	44.21	good	Negative	36	Negative	Negative	150	449	0.1	0.3	Pass	Negative	-1.5	Negative	Negative	100	283.4	PASS	Negative	35.2	Negative	Negative
28		60.2301	Ovary	0.9	83.2	good	Negative	49	Positive	Positive	150	582.5	0.09	0.26	Pass	Negative	2.7	Positive	Positive	100	400.6	PASS	Negative	87.6	Positive	Positive
29		50.9945	Ovary	0.98	232.18	good	Negative	21	Negative	Negative	150	676.9	0.09	0.17	Pass	Negative	-10.6	Negative	Negative	100	356.4	PASS	Negative	7.2	Negative	Negative
30		36.263	Peritoneum	0.9	2.96	bad	Negative	5	Negative	Negative	50	107.6	0.19	0.27	Pass	Negative	-7.1	Negative	Negative	N/A	N/A	N/A	N/A	N/A	N/A	N/A
31		52.1726	Ovary/Fallopian tube	0.9	4.25	medium	Negative	65	Positive	Positive	50	579.2	0.07	0.1	Rejected	Negative	5.9	Positive	Fail	N/A	N/A	N/A	N/A	N/A	N/A	N/A
32		58.7671	Ovary/Fallopian tube	0.98	1.71	bad	Negative	32	Negative	Negative	25	295.8	0.12	0.26	Pass	Negative	-2.4	Negative	Negative	N/A	N/A	N/A	N/A	N/A	N/A	N/A
33		66.7151	Ovary	0.5	5.16	medium	Negative	40	Negative	Negative	50	531.4	0.07	0.07	Rejected	Negative	-11.2	Negative	Fail	N/A	N/A	N/A	N/A	N/A	N/A	N/A
34		77.8493	Ovary/Uterus	0.85	34.41	good	Negative	32	Negative	Negative	100	724.9	0.06	0.15	Pass	Negative	-7.9	Negative	Negative	100	4704.2	PASS	Negative	7.1	Negative	Negative
35		75.3425	Ovary	0.8	8.4	medium	Negative	33	Negative	Negative	100	196	0.09	0.31	Pass	Negative	-8.2	Negative	Negative	N/A	N/A	N/A	N/A	N/A	N/A	N/A
36		58.7534	Ovary	0.6	1.82	bad	Negative	34	Negative	Negative	25	97.9	0.17	0.23	Rejected	Negative	-1.1	Negative	Fail	N/A	N/A	N/A	N/A	N/A	N/A	N/A
37		80.3808	Ovary	0.3	7.04	bad	BRCA1: c,2245_2246del (p,Asp749Serfs*12)	49	Positive	Positive	100	759.9	0.05	0.08	Rejected	BRCA1: c,2245_2246del (p,Asp749Serfs*12)	6.3	Positive	Fail	N/A	N/A	N/A	N/A	N/A	N/A	N/A
38		44.5151	Ovary	0.8	16.66	bad	BRCA1: c,2289del (p,Val764*)	54	Positive	Positive	100	595.6	0.09	0.26	Pass	BRCA1: c,2289del (p,Val764*)	2.9	Positive	Positive	100	397.9	PASS	BRCA1: c,2289del (p,Val764*)	40.8	Negative	Positive
39		48.5288	Ovary	0.4	111.52	medium	BRCA1: c,388del (p,Tyr130Thrfs*33)	66	Positive	Positive	100	673	0.08	0.31	Pass	BRCA1: c,388del (p,Tyr130Thrfs*33)	17.1	Positive	Positive	100	448.2	PASS	BRCA1: c,388del (p,Tyr130Thrfs*33)	92.7	Positive	Positive
40	B	48.5288	Ovary	0.4	111.52	medium	BRCA1: c,388del (p,Tyr130Thrfs*33)	66	Positive	Positive	N/A	N/A	N/A	N/A	N/A	N/A	N/A	N/A	N/A	100	194.5	FAIL	BRCA1: c,388del (p,Tyr130Thrfs*33)	95.6	Positive	Fail
41		76.0795	Ovary	0.95	43.74	good	Negative	28	Negative	Negative	100	611.5	0.1	0.31	Pass	Negative	-0.1	Negative	Negative	100	151.5	FAIL	Negative	46.1	Negative	Fail
42		62.6658	Peritoneum	0.7	48.48	medium	Negative	28	Negative	Negative	100	719.6	0.08	0.24	Pass	Negative	-4	Negative	Negative	100	259.7	PASS	Negative	22.8	Negative	Negative
43		59.0877	Peritoneum	0.5	67.14	good	Negative	23	Negative	Negative	100	871.1	0.05	0.27	Pass	Negative	-0.9	Negative	Negative	100	455.3	PASS	Negative	33.6	Negative	Negative
44		48.0164	Ovary	0.6	114.52	good	Negative	2	Negative	Negative	100	772.8	0.05	0.11	Pass	Negative	-13.4	Negative	Negative	N/A	N/A	N/A	N/A	N/A	N/A	N/A
45		39.7288	Ovary	0.8	86.02	medium	Negative	10	Negative	Negative	100	772.3	0.04	0.11	Pass	Negative	-17.5	Negative	Negative	N/A	N/A	N/A	N/A	N/A	N/A	N/A
46		61.8384	Ovary	0.6	92.28	medium	Negative	36	Negative	Negative	100	762.2	0.07	0.24	Pass	Negative	-0.3	Negative	Negative	N/A	N/A	N/A	N/A	N/A	N/A	N/A
47		57.9534	Ovary	0.7	120.32	good	Negative	13	Negative	Negative	100	825.6	0.05	0.2	Pass	Negative	-12.3	Negative	Negative	N/A	N/A	N/A	N/A	N/A	N/A	N/A
48	B	57.9534	Ovary	0.7	120.32	good	Negative	13	Negative	Negative	100	869.7	0.04	0.2	Pass	Negative	-13.9	Negative	Negative	N/A	N/A	N/A	N/A	N/A	N/A	N/A
49		53.9616	Ovary	0.6	19.28	good	BRCA2: c,2808_2811del (p,Ala938Profs*21)	48	Positive	Positive	100	342.5	0.06	0.21	Pass	BRCA2: c,2808_2811del (p,Ala938Profs*21)	3.3	Positive	Positive	100	304.2	FAIL	BRCA2: c,2808_2811del (p,Ala938Profs*21)	71.1	Positive	Fail
50		65.7836	Ovary	0.8	440.08	good	Negative	31	Negative	Negative	100	823.9	0.07	0.35	Pass	Negative	-4.4	Negative	Negative	100	494.1	PASS	Negative	55	Positive	Positive
51		69.789	Ovary	0.4	28.62	good	Negative	20	Negative	Negative	100	794	0.05	0.37	Pass	Negative	-12.2	Negative	Negative	100	344.5	PASS	Negative	6.8	Negative	Negative
52		79.9315	Fallopian tube	0.8	82.8	good	Negative	28	Negative	Negative	100	815.4	0.07	0.22	Pass	Negative	-1.3	Negative	Negative	100	338.9	PASS	Negative	76.3	Positive	Positive
53		51.0685	Fallopian tube	0.7	450.02	good	BRCA2: c,5200G>T; p,(Glu1734*)	48	Positive	Positive	100	859.2	0.08	0.2	Pass	BRCA2: c,5200G>T; p,(Glu1734*)	1.8	Positive	Positive	100	490.2	PASS	BRCA2: c,5200G>T; p,(Glu1734*) BRCA2:c,2321C>T; p,(Thr774Ile) [VUS]	94.7	Positive	Positive
54		54.4192	Ovary	0.8	277.76	good	Negative	31	Negative	Negative	100	852.6	0.06	0.27	Pass	Negative	-0.2	Negative	Negative	100	327.3	PASS	Negative	14.4	Negative	Negative
55		59.074	Ovary	0.8	34.32	medium	Negative	10	Negative	Negative	100	562.5	0.1	0.2	Pass	Negative	-9.4	Negative	Negative	100	71.5	FAIL	Negative	2.3	Negative	Fail
56		79.0603	Cervix	0.6	0.15	bad	Negative	N/A	Inconclusive	Fail	3.9	395.6	0.16	0.24	Rejected	Negative	-2	Negative	Fail	N/A	N/A	N/A	N/A	N/A	N/A	N/A
57		84.4219	Peritoneum	0.5	4.76	bad	Negative	28	Negative	Negative	50	734.9	0.06	0.1	Rejected	Negative	0.1	Negative	Fail	N/A	N/A	N/A	N/A	N/A	N/A	N/A
58		53.7726	Ovary	0.9	30.26	bad	BRCA1: c,977delins8; (p,Glu326Alafs*6)	64	Positive	Positive	100	767.7	0.07	0.17	Pass	BRCA1: c,977delins8; (p,Glu326Alafs*6)	7.2	Positive	Positive	100	431.1	PASS	BRCA1:c,980_986dup; p,(Asp330MetfsTer2)	99	Positive	Positive
59		66.9452	Ovary	0.4	1.59	bad	BRCA2: c,2239G>T (p,Glu747*)	15	Negative	Positive	25	393	0.12	0.2	Pass	BRCA2: c,2239G>T (p,Glu747*)	-5	Negative	Positive	N/A	N/A	N/A	N/A	N/A	N/A	N/A
60		61.4822	Ovary/Uterus	0.8	0.74	bad	N/A	N/A	Inconclusive	Fail	19.2	821.9	0.11	0.06	Rejected	Negative	-25.4	Negative	Fail	N/A	N/A	N/A	N/A	N/A	N/A	N/A
61		70.0795	Peritoneum	0.2	6.86	bad	Negative	40	Negative	Negative	50	681.5	0.06	0.18	Pass	Negative	-0.6	Negative	Negative	N/A	N/A	N/A	N/A	N/A	N/A	N/A
62		71.1616	Ovary	0.2	22.54	medium	Negative	27	Negative	Negative	100	600.7	0.05	0.11	Pass	Negative	0	Negative	Negative	N/A	N/A	N/A	N/A	N/A	N/A	N/A
63		75.1288	Ovary	0.9	87.24	good	Negative	4	Negative	Negative	100	810.1	0.05	0.09	Pass	Negative	-14	Negative	Negative	N/A	N/A	N/A	N/A	N/A	N/A	N/A
64		66.5863	Ovary	0.9	202.62	good	Negative	41	Negative	Negative	100	901.3	0.05	0.25	Pass	Negative	3.1	Positive	Positive	100	426.8	PASS	Negative	68	Positive	Positive
65		56.8877	Ovary/Peritoneum	0.6	17.6	bad	Negative	53	Positive	Positive	100	1050.5	0.05	0.36	Pass	Negative	8.9	Positive	Positive	100	391.1	PASS	Negative	94	Positive	Positive
66		42.6822	Ovary	0.4	30.28	bad	Negative	68	Positive	Positive	100	1190	0.05	0.24	Pass	Negative	16.5	Positive	Positive	100	313.4	PASS	Negative	100	Positive	Positive
67		55.2822	Ovary	0.8	5.76	bad	BRCA1: c,3331_3334del (p,Gln1111Asnfs*5)	70	Positive	Positive	50	663.7	0.1	0.28	Pass	BRCA1: c,3331_3334del (p,Gln1111Asnfs*5)	15.9	Positive	Positive	N/A	N/A	N/A	N/A	N/A	N/A	N/A
68		64.6329	Fallopian tube	0.7	4.5	bad	VUS reported: BRCA1 c,5303G>A (p,Cys1768Tyr)	19	Negative	Negative	50	402.4	0.12	0.22	Rejected	BRCA1: c,5303G>A (p,Cys1768Tyr) [VUS]	-8.8	Negative	Fail	N/A	N/A	N/A	N/A	N/A	N/A	N/A
69		84.3973	Peritoneum	0.6	14.08	medium	Negative	21	Negative	Negative	100	824.6	0.07	0.41	Pass	Negative	1.1	Negative	Negative	100	328.4	PASS	Negative	50.1	Positive	Positive
70		45.2849	Ovary	0.8	9.44	-	Negative	76	Positive	Positive	100	142.4	0.18	0.36	Pass	Negative	10.9	Positive	Positive	N/A	N/A	N/A	N/A	N/A	N/A	N/A
71		58.0795	Ovary	0.6	9.83	medium	Negative	74	Positive	Positive	100	144.8	0.07	0.24	Pass	Negative	15.9	Positive	Positive	N/A	N/A	N/A	N/A	N/A	N/A	N/A
72		64.7014	Ovary/Fallopian tube	0.7	3.84	bad	BRCA1: c,5177_5180del (p,Arg1726Lysfs*3)	76	Positive	Positive	50	607.8	0.15	0.37	Rejected	BRCA1: c,5177_5180del (p,Arg1726Lysfs*3)	8.8	Positive	Fail	N/A	N/A	N/A	N/A	N/A	N/A	N/A
73		50.1233	Ovary	0.5	12.8	bad	Negative	29	Negative	Negative	100	862.6	0.09	0.26	Pass	BRCA2:c,5096A>G [VUS]	-2.8	Negative	Negative	100	296.2	PASS	BRCA2:c,5096A>G [VUS]	17.9	Negative	Negative
74		70.8603	Ovary	0.6	36.6	-	Negative	53	Positive	Positive	100	533.7	0.11	0.27	Pass	Negative	4.5	Positive	Positive	100	168.5	FAIL	Negative	51	Positive	Fail
75		36.7863	Ovary	0.8	99.56	-	Negative	60	Positive	Positive	100	590.4	0.05	0.24	Pass	BRCA1:c,2705_2708delins p,(Glu902Glyfs*3) VAF:9,8%	10.6	Positive	Positive	100	369	PASS	Negative	97.1	Positive	Positive
76		71.5644	Ovary	0.8	116.7	-	Negative	36	Negative	Negative	100	742.3	0.05	0.38	Pass	Negative	2.4	Positive	Positive	100	355.5	PASS	Negative	67.2	Positive	Positive
77		44.3425	Cervix	0.2	2.58	-	Negative	44	Positive	Positive	25	505.5	0.09	0.18	Pass	Negative	0.5	Negative	Negative	N/A	N/A	N/A	N/A	N/A	N/A	N/A
78		60.5562	Ovary/Lymph node	0.2	83.66	-	BRCA1: c,5136G>A (p,Trp1712*) VUS reported BRCA1: c,4890A>T (p,Glu1630Asp)	60	Positive	Positive	100	628.1	0.05	0.16	Pass	BRCA1: c,5136G>A (p,Trp1712*) BRCA1: c,4890A>T (p,Glu1630Asp) [VUS]	15.3	Positive	Positive	100	336.1	PASS	BRCA1: c,5136G>A (p,Trp1712*)	100	Positive	Positive
79		64.2932	Ovary	0.3	68.43	-	BRCA2: c,4131_4132ins6 (p,Thr1378*) VUS reported BRCA1: c,594-21_594-1del	63	Positive	Positive	100	832.1	0.05	0.12	Pass	BRCA2: c,4131_4132ins6 (p,Thr1378*) BRCA1: c,594-21_594-1del [VUS]	16.1	Positive	Positive	100	494.4	PASS	BRCA2: c,4131_4132ins6 (p,Thr1378*)	63	Positive	Positive
80	B	64.2932	Ovary	0.4	-	-	BRCA2: c,4131_4132ins6 (p,Thr1378*) VUS reported BRCA1: c,594-21_594-1del	63	Positive	Positive	N/A	N/A	N/A	N/A	N/A	N/A	N/A	N/A	N/A	100	548.3	PASS	BRCA2: c,4131_4132ins6 (p,Thr1378*)	54.6	Positive	Positive
81		67.9589	Ovary	0.8	-	-	Negative	72	Positive	Positive	N/A	N/A	N/A	N/A	N/A	N/A	N/A	N/A	N/A	100	407.1	PASS	Negative	99.5	Positive	Positive
82		79.5836	Ovary	0.8	-	-	Negative	45	Positive	Positive	N/A	N/A	N/A	N/A	N/A	N/A	N/A	N/A	N/A	100	384.1	PASS	Negative	96.6	Positive	Positive
83		72.3699	Ovary	-	-	-	Negative	25	Negative	Negative	N/A	N/A	N/A	N/A	N/A	N/A	N/A	N/A	N/A	100	416.5	PASS	Negative	24.5	Negative	Negative
84		56.4959	Ovary	0.8	-	-	Negative	3	Negative	Negative	N/A	N/A	N/A	N/A	N/A	N/A	N/A	N/A	N/A	100	412.7	PASS	Negative	1.2	Negative	Negative
85		51.0658	Ovary	-	-	-	Negative	23	Negative	Negative	N/A	N/A	N/A	N/A	N/A	N/A	N/A	N/A	N/A	100	62.7	FAIL	Negative	8.6	Negative	Fail
86		73.0822	Ovary	0.3	-	-	Negative	41	Negative	Negative	N/A	N/A	N/A	N/A	N/A	N/A	N/A	N/A	N/A	100	349.2	PASS	Negative	97.1	Positive	Positive
87		71.3014	Ovary	0.8	-	-	Negative	49	Positive	Positive	N/A	N/A	N/A	N/A	N/A	N/A	N/A	N/A	N/A	100	417.8	PASS	Negative	80.1	Positive	Positive
88		59.8384	Ovary	0.6	-	-	VUS reported BRCA1 :c,4672C>G: (p,Leu1558Val)	31	Negative	Negative	N/A	N/A	N/A	N/A	N/A	N/A	N/A	N/A	N/A	100	361.1	PASS	BRCA1 :c,4672C>G: (p,Leu1558Val) [VUS]	8.1	Negative	Negative
89		38.9781	Ovary	-	-	-	BRCA1:c,5266dupC (p,Gln1756Profs*74)	73	Positive	Positive	N/A	N/A	N/A	N/A	N/A	N/A	N/A	N/A	N/A	100	379.1	PASS	BRCA1:c,5266dupC (p,Gln1756Profs*74)	99.6	Positive	Positive
90		58.2164	Ovary	0.7	-	-	Negative	81	Positive	Positive	N/A	N/A	N/A	N/A	N/A	N/A	N/A	N/A	N/A	100	363.4	PASS	Negative	99.1	Positive	Positive
91	B	58.2164	Ovary	0.7	-	-	Negative	81	Positive	Positive	N/A	N/A	N/A	N/A	N/A	N/A	N/A	N/A	N/A	100	405.5	PASS	Negative	98.9	Positive	Positive
92		49.326	Ovary	0.8	-	-	Negative	53	Positive	Positive	N/A	N/A	N/A	N/A	N/A	N/A	N/A	N/A	N/A	100	401.3	PASS	Negative	92.3	Positive	Positive
93		44.4877	Ovary	0.7	-	-	Negative	54	Positive	Positive	N/A	N/A	N/A	N/A	N/A	N/A	N/A	N/A	N/A	100	170.2	FAIL	Negative	74.8	Positive	Fail
Positive for P/LP variants in BRCA1/2
Discovered somatic P variant in BRCA1

## Sheet: Supplementary_Table_2
	Myriad MyChoice vs Sophia DDM HRD Solution
	PGI: PASS QC samples					PGI: FAILED QC samples					HRD status: PASS QC samples
	Replica	(blank)				Replica	(blank)				Replica	(blank)
	QA	Pass				QA	(Multiple Items)				QA	Pass
	Count of PGI status2	PGI status2				Count of PGI status2	PGI status2				Count of HRD status2	HRD status2
	PGI status	Positive	Negative	Grand Total		PGI status	Positive	Negative	Grand Total		HRD status	Positive	Negative	Grand Total
	Positive	19	1	20		Positive	3		3		Positive	20	1	21
	Negative	2	27	29		Negative		5	5		Negative	2	26	28
	Grand Total	21	28	49		Grand Total	3	5	8		Grand Total	22	27	49
		Discrepancies	0.0612245								PPV:	0.909091
											NPV:	0.962963
											% tumor HRD positive	0.44898
	Myriad MyChoice vs AmoyDx HRD Focus Panel
	PGI: PASS QC samples					PGI: FAILED QC samples					HRD status: PASS QC samples
	Replica	(blank)				Replica	(blank)				Replica	(blank)
	QA2	PASS				QA2	FAIL				QA2	PASS
	Count of PGI status3	PGI status3				Count of PGI status3	PGI status3				Count of HRD status3	HRD status3
	PGI status	Positive	Negative	Grand Total		PGI status	Positive	Negative	Grand Total		HRD status	Positive	Negative	Grand Total
	Positive	17	1	18		Positive	3		3		Positive	18		18
	Negative	6	13	19		Negative		4	4		Negative	6	13	19
	Grand Total	23	14	37		Grand Total	3	4	7		Grand Total	24	13	37
		Discrepancies	0.189189								PPV:	0.75
											NPV:	1
											% tumor HRD positive	0.648649
	Table 1
	Replica	(blank)
	Cancer location	Count of Cancer location
	Cervix	2
	Fallopian tube	3
	Ovary	64
	Ovary/Fallopian tube	3
	Ovary/Lymph node	1
	Ovary/Peritoneum	1
	Ovary/Uterus	2
	Peritoneum	9
	Grand Total	85
